# Supplementary material for: Analysis of Characteristics in the Macro-Composition and Volatile Compounds of Understory Xiaobai White Tea
Source: MDPI journal article supplement (doi:10.3390/plants12244102), 2023-12-07
Supplement: s1 [file s1]

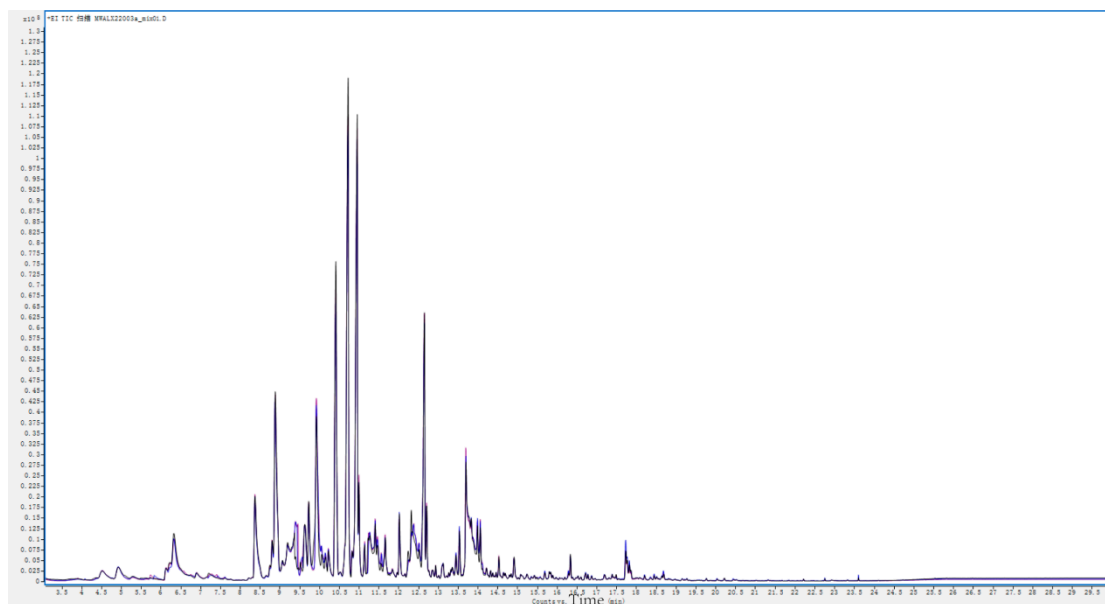

**Figure S1. Total ion chromatogram of mixed sample mass spectrometry analysis for quality control**

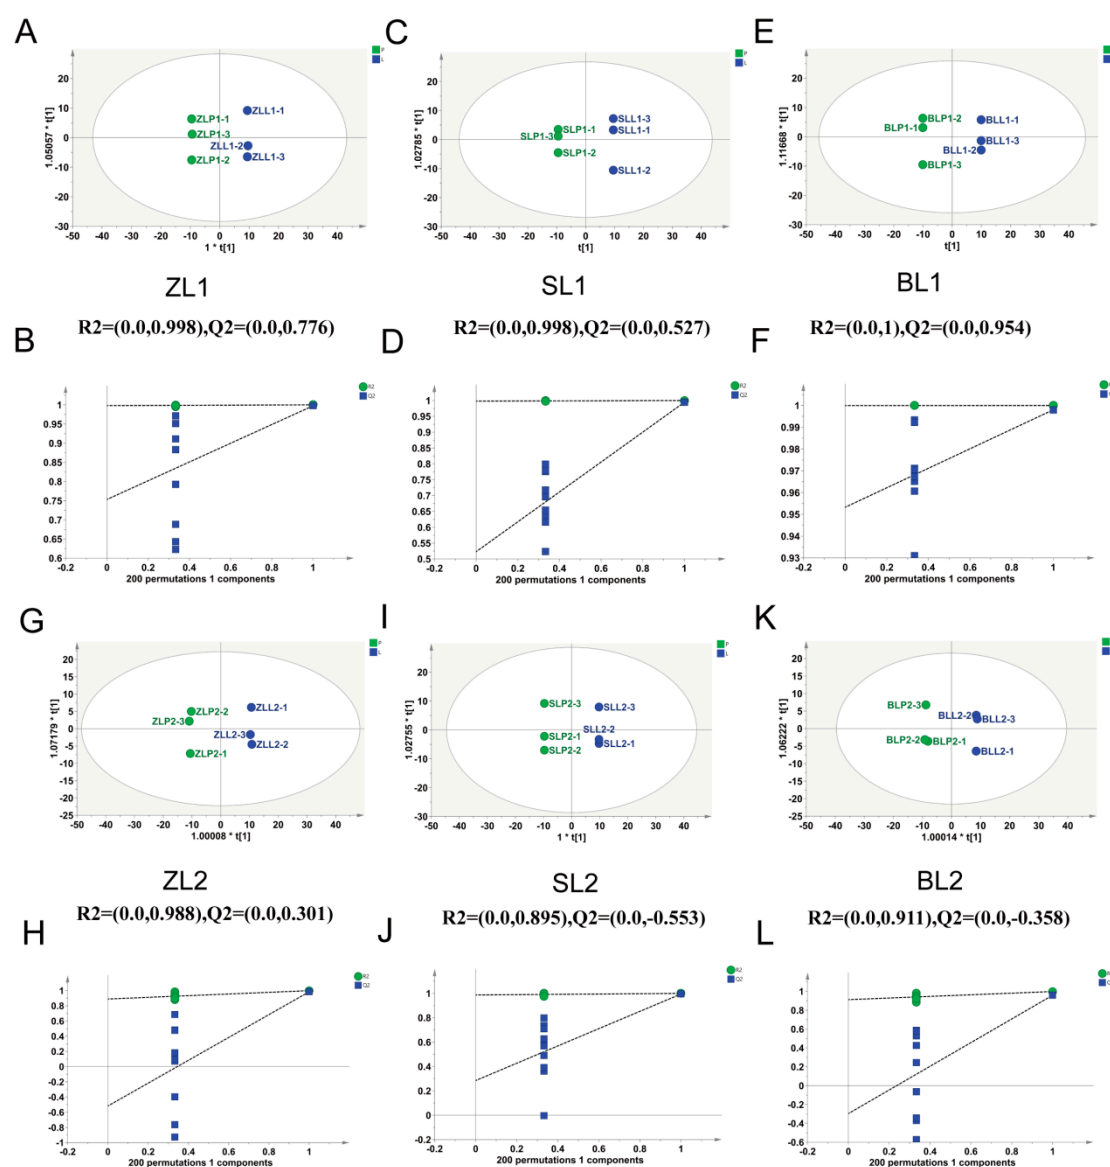

**Figure S2.** Scatter plot of volatile components of OPLS-DA scores for six sets of samples (A), (C), (E), (G), (I) and (K); OPLS-DA cross-validation results of volatile components in six groups of samples (B), (D), (F), (H), (J) and (L).
