# Supplementary material for: Analysis of Characteristics in the Macro-Composition and Volatile Compounds of Understory Xiaobai White Tea
Source: Plants (Basel). 2023 Dec 7;12(24):4102. doi: 10.3390/plants12244102 (PMC10747399; doi:10.3390/plants12244102)
Supplement: Supplementary file 1 [file plants-12-04102-s001.zip › Supplementary tables.xlsx]

## Sheet: Table S1
Table S1. The qualitative results for the VOCs in LWTs and PWTs
No.	Volatile compounds	CAS	RI	Odor description	Concentration(ug/kg)
					ZLP1	ZLL1	SLP1	SLL1	BLP1	BLL1	ZLP2	ZLL2	SLP2	SLL2	BLP2	BLL2
	Alcohols
1	DL-1-Phenethylalcohol	98-85-1	1117.9	rose	13538.95±1044.61	10549.59±849.75	11017.04±361.82	12195.94±916.96	15249.36±924.89	9371.8±567.83	13120.04±417.41	7607.99±297.36	8672.93±742.63	7701.77±478.28	12572.04±1408.2	10496.93±2491.34
2	Linalool	78-70-6	1102.5	fresh lily of the valley	8197.72±357.69	6550.61±181.43	8703.81±376.52	10209.29±296.65	10348.4±673.85	7347.71±359.06	9433.11±171.79	4273.28±405	7555.46±208.12	6843.7±136.8	10628.57±576.02	9753.86±256.82
3	trans-Linalool oxide (furanoid)	34995-77-2	1072.77	green	8064.69±326.42	8629.59±108.99	7657.41±146.43	9239.82±427.08	10579.88±673.41	7560.5±173.22	10322.16±193.39	4388.29±116.97	6481.49±261.6	7810.65±590.12	9550.49±481.89	8333.08±814.03
4	Geraniol	106-24-1	1252.64	rose	7476.78±992.31	11680.15±3870.94	22240.38±1348.48	17916.94±3289.45	15341.18±1222	18479.33±645.31	11336.79±1080.57	12025.7±1234.69	6383.3±935.45	7989.73±490.84	19172.2±470.06	17658.46±362.34
5	2-Propanol, 1-(2-methoxy-1-methylethoxy)-	20324-32-7	779.218		1459.53±103.39	1284.22±76.01	1225.84±33.72	1255.54±40.48	1531.46±135.4	1319.98±36.06	1400.16±111.89	1303.86±167.08	1437.57±122.75	1356.5±54.24	1181.27±100.32	1161.24±48.01
6	2-Amino-1,3-propanediol	534-03-2	862.494		807.06±67.24	603.76±37.3	608.53±24.31	547.01±17.15	741.14±103.75	449.55±12.26	726887.78±74.95	370.8±28.91	475.24±20.99	1059.34±168.86	595.78±39.37	623.89±119.39
7	Cyclohexanol, 2,6-dimethyl-	5337-72-4	1112.72	floral	680.73±21.97	809.92±9	846.65±36.83	905.23±30.01	572.79±49.51	605.63±14.44	815.9±27.71	519.67±19.98	1480.72±72.36	1472.91±95.69	1002.78±102.51	767.15±102.04
8	2-Heptanol	543-49-7	906.953	fresh lemon,green,herbal	255.36±174.72	1235.67±291.94	990.65±25	1725.28±428.96	778.28±210.95	1446.43±132.16	401.89±268.4	1418.47±399.72	806.48±218.04	2085.24±741.02	474.88±110.44	1592.65±143.9
9	.alpha.-Terpineol	98-55-5	1198.23	clove	244.21±24.43	271.04±38.3	359.5±14.3	338.59±8.78	288.48±35.31	271.53±39.71	283.66±23.28	217.8±12.66	167.64±10.9	212.38±16.4	539.54±25.02	430.21±31.17
10	Benzeneethanol, 4-methyl-	699-02-5	1096.72		57.49±5.35	34.19±6.07	45.06±3.33	31.29±3.34	24.49±3.39	15.49±0.62	33.35±1.53	15.23±1.98	35.71±2.29	53.17±4.81	59.9±10.39	53.77±6.83
11	N,N-Bis(2-hydroxyethyl)-m-nitroaniline	24812-82-6	1644.65		28.53±20.94	48.3±14.76	33.13±5.97	22.8±3.37	27.56±21.66	26.88±7.31	20.29±14.15	13.18±3.21	14.67±4.47	22.3±5.66	17.46±3.87	17.55±3.9
12	2-Isopropyl-5-methyl-1-heptanol	91337-07-4	1306.76		21.79±3.51	18.62±1.47	12.76±0.11	17.83±1.08	8.81±0.61	12.39±2.76	10.31±0.96	17.83±1.71	142.27±21.67	37±4.14	121.57±20.59	138.9±18.44
13	(S)-(+)-5-Methyl-1-heptanol	57803-73-3	1190.19		19.05±3.37	16.28±1.78	23.2±0.33	28.75±4.95	10.67±1.08	19.62±3.47	19.53±3.68	22.62±1.89	25.75±2.83	22.19±4.95	16.68±3.56	17.69±3.23
14	1-Undecanol	112-42-5	1390.13	orange	16.23±0.89	10.23±0.35	19.46±0.51	21.61±1.38	10.09±1.81	15.55±0.78	17.77±2.6	22.39±2.31	13.25±2.45	10.29±0.56	12.04±0.85	12.15±1.31
15	Cedrol	77-53-2	1615.27	woody,floral	15.36±3.2	66.93±18.37	3.57±0.26	9.25±1.63	10.69±0.41	17.45±0.7	13.93±2.74	32.99±3.27	2.38±0.41	3.7±0.62	45.18±7.97	374.91±37.34
16	.alpha.-Cadinol	481-34-5	1661.11		8.99±1.04	12.79±1.1	9.63±0.77	8.92±0.45	8.35±1.11	9.12±1.77	5.54±0.74	6.81±1.52	4.56±0.62	6.43±0.27	9.77±1.55	6.94±1.18
	Aromatic hydrocarbons
17	1,4-Di(methyl-d3)benzene-d4	41051-88-1	862.846		6126.79±580.05	6583.8±169.31	6527.56±235.43	6490.76±590.41	5952.56±1249.02	6805.74±249.44	6023.48±1084.23	7038.23±803.38	6060.62±970.85	6420.3±648.17	6293.71±662.45	5127.7±1615.17
18	Naphthalene	91-20-3	1188.22	camphor	1891.27±212.5	1743.29±41.09	1218.33±49.52	1446.4±94.58	1345.25±106.16	1304.25±84.28	1028.27±85.11	1483.69±79.91	1012.08±181.99	1192.2±60.93	882.54±77.35	1017.19±98.03
19	Benzene, 1,2,3,5-tetramethyl-	527-53-7	1120.18		643.95±120.41	559.58±27.29	472.62±43.13	597.8±103.44	355.87±69.83	451.35±59.89	416.26±76.13	683.61±133.83	406.81±114.05	437.31±51.17	359.38±50.4	384.83±43.02
20	o-Cymene	527-84-4	1024.52	woody,herbal	584.5±58.13	659.09±70.7	874.42±16.47	822.22±38.93	732.25±13.88	761.38±34.28	692.77±15.75	701.73±22.35	471.45±23.2	512.26±7.33	823.38±70.96	1085.01±7.48
21	Benzene, 1,2,4,5-tetramethyl-	95-93-2	1151.27		358.3±59.63	330.33±16.91	268.24±16.08	343.65±49.45	201.92±27.39	232.61±28.02	248.72±53.53	377.23±58.15	239.24±55.01	246.97±25.6	191.4±29.48	211.94±22.9
22	Benzene, 2-ethyl-1,4-dimethyl-	1758-88-9	1130.19		175.01±6.55	246.03±28.05	320.19±18.69	304.59±27.87	281.71±10.3	286.5±6.04	263.24±24.91	293.22±3.85	137.7±12.36	172.47±6.78	285.17±36.65	354.37±21.75
23	Benzene, 4-ethenyl-1,2-dimethyl-	27831-13-6	1091.76		123.16±11.16	150.51±17.02	178.95±1.18	169.07±6.43	150.13±1.8	157.55±4.69	150.87±2.95	156.07±4.11	103.62±6.43	104.28±1.8	215.91±12.79	231.37±3.3
24	Benzene, 1-ethyl-4-(1-methylethyl)-	4218-48-8	1207.08		101.91±16.81	93.36±6.28	80.03±9.76	104.01±11.81	57.85±2.93	61.14±2.52	66.3±10.77	94.01±11.86	62.2±11.54	54.7±5.62	50.72±9.74	59.03±4.73
25	1,3-Benzenediol, 5-pentyl-	500-66-3	1520		93.52±17.01	119.67±17.34	48.57±4.29	50.7±5.44	41.83±4.74	65.56±15.3	55.91±9.12	64.46±13.96	41.4±1.83	44.14±1.6	51.65±3.82	63.02±13.25
26	Naphthalene, 2-methyl-	91-57-6	1300.4	kerosene	70.37±6.45	74.84±1.33	49±2.64	56.46±1.71	61.91±4.79	57.35±4.41	35.63±6.57	41.68±2.76	34.77±2.76	42.83±2.97	32.88±2.26	79.48±1.68
27	Estragole	140-67-0	1289.17	fenel	52.89±1.97	115.61±22.83	45.7±3.28	82.7±2.31	66.19±3.71	88.34±4.12	57.5±7.09	85.96±7.39	38.9±5.05	66.39±1.73	64.78±3.4	92.12±3.11
28	1,4-Benzenedicarboxaldehyde, 2-methyl-	27587-17-3	1278.37		50.96±2.36	79.56±14.84	62.3±3.69	66.33±9.21	53.87±6.87	54.83±15.78	55.99±14.69	57.45±13.15	46.17±2.59	48.82±4.45	56.25±5.44	55.59±7.49
29	Toluene	108-88-3	763.355	sweet	38.45±3.09	58.8±5.52	54.58±2.54	51.02±1.6	59.38±1.18	37.15±0.69	63.85±1.81	44.7±2.7	75.56±7.64	79.89±3.21	74.55±9.36	178.46±7.07
30	Benzene, 1-ethoxy-4-ethyl-	1585-06-4	1215.24		37.84±7.31	34.81±1.57	26.57±1.04	35.78±5.25	17.63±0.45	23.81±2.91	19.34±4.67	28.88±3.34	15.66±2.91	14.75±2.36	14.22±0.89	16.73±2.5
31	Benzene, 1,3-dimethyl-	108-38-3	868.075	sweet floral	32.34±4.7	48.9±9.61	22.92±1	45.44±6.78	23.42±2.46	44.78±7.65	27.01±4.4	41.68±3.8	23.04±0.6	39.63±3.09	21.88±3.06	33.54±3.37
32	Benzene, ethylpentamethyl-	2388-04-7	1419.81		29.46±1.1	56.73±7	29.67±0.94	7.64±0.09	13.29±2.65	13.53±1.21	16.25±1.9	36.3±2.53	13.71±1.73	16.71±1.7	394.32±20.52	93.76±7.57
33	Thiophene, 2-hexyl-	18794-77-9	1235.22		28.41±2.4	38.04±6.5	55.04±3.48	42.66±1.58	48.13±4.34	24.49±3.73	38.41±2.67	18.61±2.49	55.65±2.2	70.59±5.19	69.38±4.51	40.9±6.36
34	Benzene, 1,4-dimethyl-2,5-bis(1-methylethyl)-	10375-96-9	1362.22		17.65±1.66	23.18±5.13	17.77±0.9	15.4±0.88	12.4±0.64	16.49±4.16	15.93±2.78	14.98±0.58	20.13±0.38	19.76±0.42	17.29±1.84	13.67±1.45
35	Phenol, 4-ethyl-	123-07-9	917.294	spicy,woody,sweet	17.19±6.5	17.15±1.92	32.55±2.82	38.87±2.03	23.7±2.95	17.46±4.88	19.86±0.87	15.79±0.67	40.44±6.73	147.69±10.69	31.69±5	192.21±36.62
36	Benzene, 1-octenyl-	29518-72-7	1486.04		8.98±0.42	9.21±2.03	6.92±0.66	6.58±1.26	6.03±0.52	5±0.59	8.61±0.79	2.73±0.68	4.59±0.74	16.72±1.46	6.54±0.6	9.76±0.41
37	Benzene, 1,2,3,5-tetramethyl-4,6-dinitro-	4674-22-0	1723.51		7.56±1.1	5.78±1.1	4.98±0.48	5.15±0.23	3.31±0.12	4.25±0.12	2.76±0.22	3.04±0.13	4.07±1.1	3.71±0.55	4.52±0.11	2.62±0.09
38	5-Amino-2-methoxybenzonitrile	214623-57-1	1246.12		6.88±0.53	7.09±0.82	7.22±0.27	6.95±0.54	5.29±0.19	4.09±0.24	6.55±0.76	6.26±0.45	6.09±0.44	5.48±0.11	7.8±0.27	6.3±0.71
39	1,2-Naphthalenedione, 3,8-dimethyl-5-(1-methylethyl)-	5574-34-5	1619.03		4.62±0.31	3.91±0.89	4.57±0.72	5.22±0.36	10.48±1.48	3.34±0.25	3.56±0.11	2.35±0.33	1.62±0.27	2.17±0.19	4.12±0.31	5.16±0.48
40	Benzenamine, 4-(hexyloxy)-	39905-57-2	1375.18		3.51±0.46	3.13±0.33	3.96±0.44	4.4±0.08	3.11±0.37	3.03±0.28	2.69±0.3	1.79±0.26	3.8±0.66	4.02±0.56	3.96±0.4	4.88±0.69
41	Naphthalene, 1,2-dihydro-1,1,6-trimethyl-	30364-38-6	1408.24	kerosene	2.91±0.02	4.23±0.51	1.99±0.01	2.16±0.41	2.35±0.28	1.82±0.17	2.27±0.27	2.08±0.41	1.91±0.24	3.7±0.21	1.74±0.1	5.04±0.27
	Phenols
42	Phenol, 4-ethyl-2-methyl-	2219-73-0	1085.57		343.41±31.97	351.76±54.97	582.7±27.61	535.07±34.86	484.54±16.64	476.55±36.73	430.86±10.26	389.15±23.49	271.84±15.94	265.49±8.2	558.54±49.04	579.37±18.11
43	2-Aminoresorcinol	3163-15-3	1177.39		311.7±17.91	406.34±78.51	351.43±12.7	350.53±9.38	357.5±24.02	326.4±65	329.31±35.45	313.16±22.31	302.72±15.68	283.62±26.83	347.89±36.92	313.74±64.06
44	2,4-Di-tert-butylphenol	96-76-4	1505.15	fruity	187.97±36.83	279.36±14.34	229.63±8.37	223.87±8.71	183.8±20.28	246.01±35.51	175.88±20.06	309.91±39.23	177.5±6.41	200.92±3.6	228.31±35.97	198.41±16.92
45	Phenol, 2-methoxy-	90-05-1	882.962	pungency	14.3±2.21	34.6±2.68	46.97±2.73	35.04±0.55	31.24±2.75	20.97±3.34	24.21±1.26	19.99±1.54	40.97±2.88	38.23±3.62	44.44±8.77	51.3±21.93
46	Parapropamol	1693-37-4	1587.84		10.18±1.48	12.68±1.99	15.77±1.21	16.78±1.4	12.02±1.76	11.48±3.58	11.46±1.83	5.3±0.82	24.06±2.86	30.9±0.2	26.94±4.46	13.25±0.89
47	1,4-Benzenediol, 2,5-bis(1,1-dimethylethyl)-	88-58-4	1723.52		9.53±1.24	7.41±1.25	5.44±0.36	5.66±0.31	4.16±1.01	5.38±0.59	3.85±0.25	4.25±0.26	3.94±1.12	4.28±0.06	5.17±0.33	3.81±0.18
48	Butylated Hydroxytoluene	128-37-0	1501.67		6.68±0.39	15.65±1.76	10.81±0.66	8.89±0.75	7.25±0.99	7.69±0.36	5.43±1.08	6.13±1.08	4.64±0.31	6.55±0.34	9.04±0.57	5.28±0.34
49	p-(Benzylideneamino)phenol	588-53-4	1532.61		2.25±0.23	1.61±0.08	2.83±0.11	3.18±0.07	1.14±0.16	2.04±0.15	2.44±0.3	3.54±0.24	2.24±0.31	1.47±0.15	1.88±0.18	2.1±0.22
	Nitrogenous compounds
50	4-Pyridinecarboxamide	1453-82-3			4487.19±363.76	3219.61±279.38	3416.74±148.79	3696.73±290.27	4684.23±283.39	2843.76±60.87	4029.86±107.53	2266.23±143.14	2633.2±207.56	2311.13±176.55	3811.03±445.99	3256.96±771.57
51	2,5-Pyrrolidinedione, 1-ethyl-	2314-78-5			543.48±64.24	288.27±22.28	199.06±10.46	207.44±8.26	372.22±56.04	276.04±42.04	254.26±40.64	245.96±39.05	138.2±2.34	397.29±41.92	361.6±47.06	185.71±49.99
52	Benzonitrile, 4-methyl-	104-85-8			143.61±20.57	204.8±1.45	256.84±15.92	196.27±10.38	90.94±11.48	125.66±18.14	123.41±17.57	157.52±24.2	139.01±18.23	972.5±69.76	122.18±9.02	251.32±44.35
53	1,6-Hexanediamine, N,N,N',N'-tetramethyl-	111-18-2			75.88±9.55	79.36±4.16	136.83±6.75	136.82±5.94	140.33±22.75	51.19±13.16	153.29±6.16	91.84±18.99	205.98±15.99	296.08±11.04	252.99±17.92	218.71±28.52
54	5-Isothiazolecarboxamide	3683-98-5			49.35±3.95	37.34±2.16	52.06±1.03	66.75±6.23	68.02±6.62	41.16±1.84	59.47±1.14	35.1±3.34	47.22±1.9	41.28±2.42	73.09±8.88	61.28±4.8
55	1H-Isoindole-1,3(2H)-dione, 3a,4,7,7a-tetrahydro-, cis-	1469-48-3			6.49±0.27	5.51±0.7	4.72±0.32	3.9±0.33	3.37±0.21	4.26±0.83	3.87±0.28	4.62±0.89	4.88±0.73	4.92±0.17	0±0	0±0
	Aldehyde
56	Benzaldehyde	100-52-7	963.255	roasted sweet,almond	5724.66±580.46	5290.44±108.86	5708.8±44.95	4468.88±214	4719.3±773.01	2583.18±69.68	7965.9±543.39	4068.37±172.18	5768.46±195.34	6002.58±476.46	7186.56±235.12	6624.98±866.04
57	2,6-Octadienal, 3,7-dimethyl-, (E)-	141-27-5	1268.51	lemon	1391.75±78.74	2064.59±310.73	3414.05±166.97	3026.45±290	2768.52±214.66	2971.79±219.52	2567.44±88.3	2372.85±161.71	1852.45±89.13	1914.65±18.77	3205.45±138.38	3339.07±107.63
58	Hexanal	66-25-1	797.996	fruity	844.25±67.22	885.9±55.75	940.38±11.5	1218.66±64.46	1164.35±101.28	782.55±52.68	1251.71±97.47	487.49±54.28	1459.78±63.31	1229.36±67.6	1256.43±214.07	1310.25±224.02
59	Isophthalaldehyde	626-19-7	1179.91		567.6±38.59	568.72±36.9	471.07±30.22	649.57±40.69	649.21±30.99	486.25±32.48	646.87±27.93	493±17.36	373.84±52.32	359.71±34.46	506.57±37	555.43±159.48
60	Nonanal	124-19-6	1105.25	rose,orange	393.73±41.09	367.63±30.7	330.01±8.5	298.85±27.92	304.19±24.86	336.2±18.93	305.59±16.72	321.76±32.13	466±43.15	269.09±15.61	288.71±34.47	355±44.5
61	2-Hexenal	505-57-7	853.406	fresh fruity,green	303.13±44.86	348.45±26.66	379.92±17.31	375.81±25.64	345.06±66.65	415.85±32.06	314.63±31.48	207.4±19.98	395.8±30.2	332.73±37.87	310.63±42.03	278.25±66.58
62	Benzaldehyde, 2,4-dimethyl-	15764-16-6	1220.88	warm sweet	278.05±72.81	321.17±121.81	172.62±23.97	302.08±65.09	224.29±47.98	234.53±77.76	203.59±72.9	347.84±73.97	154.24±36.88	193.53±12.18	218.04±71.16	159.77±10.66
63	Neral	106-26-3	1239.19	lemon	215.54±28.08	287.9±41.7	411.74±26.92	368.7±26.39	336.36±26.19	384.36±22.52	345.61±13.5	245.69±12.15	227.83±22.15	179.9±4.01	400.16±15.98	482.16±2.95
64	1-Cyclohexene-1-carboxaldehyde, 2,6,6-trimethyl-	432-25-7	1221.41	sweet	213.14±11.93	187.87±1.67	132.81±3.91	132.78±4.58	87.71±3.52	98.95±5.08	165.48±5.48	123.05±2.24	185.53±1.99	106.95±1.25	116.66±4.98	107.93±5.9
65	1,3-Cyclohexadiene-1-carboxaldehyde, 2,6,6-trimethyl-	116-26-7	1201.66	woody,fruity	140.48±7.11	103.2±5.52	63.13±1.22	70.31±2.31	90.16±6.83	64.81±5.14	89.96±1.48	68.8±0.86	58.88±0.62	166.76±5.36	69.57±3.54	70±2.14
66	2-Pentenal, 2-methyl-	623-36-9	829.907		51.71±6.16	56.42±2.48	74.95±1.69	97.11±6.28	91.71±9.57	0±0	78.9±11.45	0±0	314.13±33.53	185.09±17.04	218.93±24.73	372±43.59
67	2-Butenal, 2-ethyl-	19780-25-7	829.907		50.35±6.5	60.68±1.93	77.2±3.45	99.75±1.05	84.14±19.69	0±0	86.26±2.28	0±0	313.9±27.95	191.95±24.02	230.52±21.7	372.19±43.48
68	2,6-Nonadienal, (E,E)-	17587-33-6	1154.24		42.5±5.75	41.85±2.48	29.07±2.84	27.21±1.45	47.02±4.21	34.61±2.92	48.94±2.44	26.45±4.26	37.06±1.34	38.32±2.12	37.18±5.17	42.17±13.12
69	2-Octenal, 2-butyl-	13019-16-4	1370.44	green,sweet	39.9±3.78	46.53±5.19	74.88±0.73	104.23±6.04	32.28±1.83	30.58±0.82	64.97±6.94	54.23±6.39	103.06±9.42	94.99±5.35	102.05±1.17	103.22±9.89
70	Benzeneacetaldehyde, .alpha.-ethylidene-	4411-89-6	1271.24	floral,honey	37.27±2.92	38.1±8.39	31.42±2.35	22.46±3.35	34.34±3	20.06±0.61	37.75±4.17	12.63±3.89	27.73±1.66	50.93±1.79	49.35±3.51	65.73±10.19
	Acid
71	Cyclobutylcarboxamide, N-methallyl-	1000340-37-0	1183.29		1208.12±80.36	1275.14±100.97	1167.71±70.56	1368.74±86.2	1506.44±104.56	1045.28±104.46	1314.58±9.06	1063.63±19.3	897.34±65.61	926.13±72.37	1255.88±96.44	1133.77±274.33
72	Octanoic acid	124-07-2	1179.26	cheese	838.13±84.15	1087.31±108.15	1017.32±77.91	1174.41±65.05	1276.56±91.14	979.52±55.5	1065.81±179.96	917.48±37.27	808.29±26.34	813.71±125.49	1088.56±151	1018.66±214.62
73	Pentanoic acid	109-52-4	904.43	wine	493.94±58.84	672.66±46.48	1051.58±29.54	954.11±19.88	860.34±170.25	529.39±28.38	906.52±74.66	441.77±37.95	1194.73±68.28	1650.4±247.79	1234.06±146.65	1118.36±320.86
74	4,5-Dihydro-3-furoic acid	98021-62-6	1044.28		419.12±49.8	408.88±17.38	533.01±11.02	524.08±15.99	431.63±43.61	402.3±62.89	509.63±47.63	0±0	460.51±7.08	434.94±26.59	534±75.42	566.51±107.03
75	1H-Imidazole-4-carboxylic acid	1072-84-0	1160.96		249.96±19.8	305.11±9.13	296.11±6.69	284.43±11.05	335.62±20	290.76±18.01	272.57±29.82	314.28±26.33	322.65±3.2	331.2±33.62	256.77±4.12	282.98±20.4
76	Hexanoic acid	142-62-1	905.173	cheese	248.89±177.75	1241.62±269.78	1018.58±496.53	1711.41±425.97	756.88±225.64	1529.45±380.56	396.28±263.51	1409.11±399.97	788.63±220.97	2075.92±746.48	472.59±92.05	1652.86±103.43
77	Butanoic acid, 2-methyl-	116-53-0	871.3	fruity	247.71±39.46	242.8±12.32	318.67±28.05	276.41±29.85	216.46±47.38	173.38±17.41	230.24±36.51	63.87±8.74	499.72±41.41	268.62±45.01	248.6±11.58	357.29±74.28
	Terpenes
78	.beta.-Myrcene	123-35-3	989.303	sweet orange	7473.37±614.5	8822.25±1550.62	12793.88±325.88	11822.1±605.42	11255.38±223.22	11706.81±548.85	9815.59±235.36	10420.07±490.12	6339.74±383.43	6217.15±149.42	12331.91±516.69	12172.42±246.88
79	1,3,6-Octatriene, 3,7-dimethyl-, (Z)-	3338-55-4	1045.77	floral,woody,sweet	3122.77±239.8	3797.64±719.08	6151.49±306.89	5328.06±453.3	4869.42±170.93	5287.55±397.11	4180.55±106.8	4522.04±257.55	2655.45±174.73	2590.01±65.43	5638.24±413.72	5620.9±211.96
80	trans-.beta.-Ocimene	3779-61-1	1035.01		2273.74±190.39	2766.6±549.95	4574.86±227.35	3939.57±346.15	3543.65±94.53	3876.73±291.35	3052.14±79.71	3273.72±202.68	1894.5±134.29	1827.17±54.32	4129.99±316.09	4114.36±151.49
81	.beta.-Phellandrene	555-10-2	1030.3	pepper	1758.84±156.2	1820.41±267.99	2832.12±116.58	2638.76±184.09	2390.21±46.36	2386.26±166.2	2169.22±33.89	1986.99±93.19	1428.59±75.54	1329.84±38.66	2768.67±238.88	2823.49±75.09
82	3-Carene	13466-78-9	13466-78-9	lemon	541.97±57.28	590.57±90.47	940.84±41.26	874.6±67.96	763.96±17.06	775.47±50.69	693.09±15.05	649.26±30.92	455.36±26.37	439.65±9.23	914.62±85.45	955.22±26.06
83	2,4,6-Octatriene, 2,6-dimethyl-, (E,Z)-	7216-56-0	1127.37	green,floral	462.44±44.61	559.92±115.67	949.21±42.29	801.85±69.26	731.96±25.77	797.73±62.53	620.39±21.19	672.5±43.91	378.25±31.96	367.16±15.27	839.78±79.17	847.5±44.67
84	1,3-Cyclohexadiene, 1-methyl-4-(1-methylethyl)-	99-86-5	1016.58	orange,lemon	406.04±39.03	443.56±75.19	719.39±33	650.05±55.99	577.49±10.96	595.46±45.4	507.33±13.36	491.39±27.09	320.89±19.12	298.76±9.95	664.36±53.97	685.78±19.09
85	.gamma.-Terpinene	99-85-4	1057.86	orange,lemon	297.22±17.83	346.15±52.08	556.91±32.62	495.06±39.86	443.92±13.4	443.26±37.31	384.57±5.63	370.4±18.06	270.91±15.55	240.08±5.62	508.89±51.59	541.03±12.87
86	2H-Pyran, 2-(bromomethyl)tetrahydro-	34723-82-5	1127.58		178.95±8.34	189.59±17.52	227.91±6.56	222.18±8.67	232.25±19.03	155.12±8.57	211.52±5.9	137.23±5.88	185.12±9.49	226.07±9.07	258.23±24.74	224.88±34.93
87	Naphthalene, 1,2,3,4-tetrahydro-1,6-dimethyl-4-(1-methylethyl)-, (1S-cis)-	483-77-2	1523.22		161.51±14.04	105.81±15.61	112.71±4.81	197.64±1.71	441.82±64.16	91.99±4.18	129.26±2.79	76.55±10.08	54.72±3.7	94.04±5.72	129.47±7.5	201.23±8.76
88	1H-3a,7-Methanoazulene, 2,3,4,7,8,8a-hexahydro-3,6,8,8-tetramethyl-, [3R-(3.alpha.,3a.beta.,7.beta.,8a.alpha.)]-	469-61-4	1420.13	woody	70.11±1.66	176.4±32.16	55.62±3.22	14.77±0.6	43.52±11.99	44.4±4.73	42.51±5.21	103.47±6.03	27.28±3.28	31.56±2.75	1076.89±62.45	211.81±16.16
89	Naphthalene, 1,2,3,5,6,8a-hexahydro-4,7-dimethyl-1-(1-methylethyl)-, (1S-cis)-	483-76-1	1519.26	woody	67.08±5.5	37.53±6.62	56.4±7.13	65.65±0.25	175.25±29.21	34.29±0.89	46.61±0.91	31.37±4.13	15.56±1.24	19.71±2.83	43.67±3.27	59.98±1.45
90	Terpinen-4-ol	562-74-3	1183.44	floral	49.38±9.71	95.21±21.39	131.94±4.07	126.52±10.74	72.3±4.48	65.76±4.17	64.96±2.36	57.37±2.6	72.17±2.77	72±11.68	100.02±15.01	141.19±33.62
91	Tridecane, 3-methylene-	19780-34-8	1382.76		47.4±3.88	26.41±1.43	57.32±3.81	67.39±2.77	20.08±0.94	46.04±4.51	61.02±8.75	78.89±5.8	36.44±5.04	24.82±0.51	17.83±1.22	20.7±2.88
92	.alpha.-Calacorene	21391-99-1	1543.64		39.75±1.87	33.48±5.66	37.58±3.74	48.25±1.29	98.53±17.12	28.42±1.62	34.4±2	18.49±2.47	13.35±1.16	18.48±2.34	40.17±2.38	45.31±2.7
93	1H-3a,7-Methanoazulene, octahydro-3,8,8-trimethyl-6-methylene-, [3R-(3.alpha.,3a.beta.,7.beta.,8a.alpha.)]-	546-28-1	1428.46	woody	29.53±1.57	78.44±15.32	23.29±1.56	7.5±0.09	16.95±2.24	18.87±1.89	18.42±2.35	45.03±2.36	11.55±1.54	13.03±1.2	467.64±17.56	90.73±8.86
94	Naphthalene, 1,2,3,4,4a,5,6,8a-octahydro-7-methyl-4-methylene-1-(1-methylethyl)-, (1.alpha.,4a.beta.,8a.alpha.)-	39029-41-9	1451.14		20.73±3.89	15.68±0.98	17.23±2.25	16.95±1.66	8.5±0.86	11.96±0.39	13.49±1.31	13.57±2.44	9.6±2.25	11.31±1.44	10.35±1.39	10.8±2.14
95	.alpha.-Cubebene	17699-14-8	1377.98	green	16.96±0.83	19.32±0.43	7.44±0.49	12.34±0.95	8.01±0.66	4.72±0.25	11.25±0.96	9.16±1.53	6.38±0.83	5.64±0.22	10.71±1.36	10.78±1.06
96	1-Dodecene	112-41-4	1390.13		12.15±0.81	8.49±1.07	16.48±0.77	17.45±1.12	7.81±1.49	12.16±0.74	14.29±2.23	18.87±2.04	8.94±1.58	7.84±0.62	9.25±1.41	8.19±0.93
97	(1R)-2,6,6-Trimethylbicyclo[3.1.1]hept-2-ene	7785-70-8	932.314	floral fruity	6.77±1.74	6.75±1.4	8.74±0.78	8.28±1.28	5.59±0.57	14.89±8.92	6.84±1.73	20.46±20.42	7.24±1.25	6.92±1.41	218.56±65.02	56.31±5.86
98	Benzene, 1-methyl-4-(1,2,2-trimethylcyclopentyl)-, (R)-	16982-00-6	1511.4	spices	4.54±0.18	8.24±0.75	1.34±0.09	6.55±0.42	2.83±0.38	4.89±0.31	2.24±0.12	4.78±0.44	1.89±0.2	2.85±0.05	15.44±1.14	76.35±1.35
99	Neophytadiene	504-96-1	1835.83	fresh	1.62±0.88	3.06±0.29	1.69±0.14	2.67±0.05	1.62±0.63	2.79±0.63	1.41±0.69	3.07±1.72	0.99±0.25	1.39±0.31	0.79±0.22	1.62±0.49
	Hydrocarbons
100	Dodecane	112-40-3	1198.62	alkane	1308.32±192.79	976.63±89.44	959.71±116.94	1161.21±113.7	727.87±122.83	1219.67±23.86	1071.83±220.99	1373.91±112.05	926.82±130.59	727.7±82.13	712.98±99.81	957.59±137.52
101	Dodecane, 2,6,11-trimethyl-	31295-56-4	1272.52		718.59±108.19	732.43±30.56	477.94±32.01	642.77±59.96	340.92±9.34	398.1±60.02	339.73±42.64	566.71±41.97	674.79±87.04	424.27±47.53	615.19±72.78	638.85±62.41
102	Tetradecane	629-59-4	1397.98		534.71±53.16	392.65±20.85	482.88±21.94	543.88±29.06	392.88±115.44	615.03±31.44	639.07±95.4	847.79±127.61	491.76±87.19	461.69±16.71	468.44±46.08	634.89±89.51
103	Undecane, 2,5-dimethyl-	17301-22-3	1211.03		512.95±81.83	467.51±11.04	377.56±14.33	473.92±42.6	246.81±10.64	320.19±44.07	248.91±40.52	324.05±35.07	223.85±44.19	211.15±32.34	196.03±24.62	227.69±15.51
104	Nonane, 2,2,4,4,6,8,8-heptamethyl-	4390-04-9	1250.54		321.29±98.64	276.72±20.69	219.7±25.44	255.01±26.11	141.08±5.4	177.02±31.57	153.42±36.8	317.47±59.64	130.75±19.99	121±13.75	110.18±18.25	134.94±15.19
105	Decane, 4-methyl-	2847-72-5	1020.47		293.28±57.09	260.87±9.95	161.71±18.12	229.91±37.23	106.27±9.86	156.28±13.92	95.53±11.58	139.4±31.85	102.17±34.3	100.7±15.32	75.17±22.17	79.48±6.11
106	Decane	124-18-5	998.611		262.7±44.86	192.41±8.86	168.98±16.09	235.54±25.3	110.86±32.17	207.09±8.29	166.07±33.51	190.56±26.11	143.31±24.03	138.17±29.1	114.6±15.97	130.16±17.83
107	Tridecane, 3-methyl-	6418-41-3	1368.49		262.57±23.71	188.92±10.59	287.49±13.45	343.33±16.63	132.08±10.18	220.68±16.09	271.86±35.81	338.52±23.6	213.93±32.47	151.28±12.74	136.1±7.93	165.09±14.2
108	Dodecane, 4-methyl-	6117-97-1	1219.67		253.41±42.4	233.87±14.79	174.81±6.01	237.94±18.93	120.43±9.84	133.09±16.84	111.74±15.5	147.26±16.19	100.89±16.42	89.06±8.5	85.24±6.77	108.03±6.22
109	Octadecane	593-45-3	1485.17		248.67±3.64	308.94±5.11	181.11±11.43	190.16±8.67	123.83±4.38	131.44±15.24	112.4±8.44	204.69±30.49	308.38±13.2	207.53±16.11	246.72±18.39	255.49±29.34
110	Hexane, 3-methyl-	589-34-4	749.213		205.45±37.39	129.25±8.35	198.73±15.47	155.26±17.38	237.67±34.47	110.23±5.75	164.74±24.93	54.27±6.34	309.2±22.57	181.71±14.96	299.69±21.82	298.64±24.79
111	1,3-Cyclopentadiene, 1,2,3,4,5-pentamethyl-	4045-44-7	1139.88		170.97±12.35	217.44±41.61	376.95±15.72	304.12±22.44	290.54±11.9	295.18±26.6	244.53±6.92	270.4±13.44	166.01±7.79	165.79±0.33	342.55±34.21	355.92±20.67
112	Dodecane, 2-methyl-	1560-97-0	1408.79		155.7±9.5	179.98±1.25	140.43±13.33	158.86±8.68	99.12±1.77	111.83±12.04	94.79±6.14	138.9±15.47	103.6±4.06	92.6±9.23	100.19±3.92	111.41±8.85
113	Undecane, 3,8-dimethyl-	17301-30-3	1328.54		126.7±19.82	134.7±4.64	104.04±10.31	127.9±6.87	53.88±2	76.42±7.77	85.84±9.37	152.8±12.42	258.11±28.81	132.34±2.19	228.73±31.2	233.91±30.09
114	Dodecane, 2,6,10-trimethyl-	3891-98-3	1373.2		124.84±8.41	74.64±1.05	81.34±3.02	91.41±2.24	92.89±3.67	102.08±11.84	80.71±9.12	86.27±5.78	87±18.9	87.23±9.54	68.34±8.33	59.85±5.82
115	Undecane, 5-methyl-	1632-70-8	1152.91		92.68±12.56	75.62±4.14	66.01±5.28	89.37±6.11	43.63±2.72	64.55±6.21	52.43±9.07	69.12±7.29	46.67±9.61	40.58±3.88	42.89±6.6	46.76±3.64
116	Decane, 1-iodo-	2050-77-3	1480.82		85.12±2.12	105.92±10.7	76.19±3.49	83.77±3.11	52.03±1.06	57.47±7.78	48.75±4.45	70.32±12.83	88.65±5.61	72.6±5.79	73.29±9.59	85.7±5.31
117	Pentadecane	629-62-9	1343.7		69.42±14.24	50.11±6.28	39.47±5.17	39.7±2.62	55.25±6.32	54.93±6.56	29.31±3.49	28.69±2.87	37.74±4.67	44.22±8.15	59.71±6.23	36.18±7.49
118	Hexadecane	544-76-3	1597.87	orchid	63.77±5.57	46.74±3.25	72.14±2.61	62.36±0.5	66.87±17.71	88.42±4.75	63.72±9.37	92.25±20.86	38.62±5.19	51.16±1.09	60.58±11.97	75.36±10.79
119	Pentadecane, 3-methyl-	2882-96-4	1568.64		63.33±5.22	48.56±2.87	74.92±2.08	79.97±2.34	36.97±5.74	63.69±6.03	65.01±9.56	92.84±13.2	46.64±5.42	36.7±1.76	40.77±4.05	43.16±5.26
120	1-Oxaspiro[4.5]dec-6-ene, 2,6,10,10-tetramethyl-	36431-72-8	1370	fruity,woody	63.13±5.89	62.68±5.61	35.94±0.5	45.51±4.47	43.11±3.05	37.56±4.86	39.64±3.57	22.1±1.59	51.8±8.55	58.34±7.37	23.39±3.11	28.73±3.08
121	Tetradecane, 4-methyl-	25117-24-2	1418.83		52.45±4.51	62.81±2.02	53.88±3.08	58.32±1.52	32.87±1.8	34.88±4.53	28.66±3.41	42.75±3.69	29.27±2.61	29.42±1.37	66.62±3.28	43.7±2.34
122	Cyclohexane, undecyl-	54105-66-7	1448.1		39.02±1.74	29.69±2.69	33.41±2.07	38.55±2.03	20.9±1.7	33.01±2.43	32.31±2.86	32.71±2.44	28.97±3.61	24.75±0.8	23.2±0.7	22.9±1.57
123	Tridecane, 5-methyl-	25117-31-1	1350.62		38.46±9.28	25.67±3.26	37.05±1.46	37.83±2.64	23.02±3.07	37.56±1.81	34.4±7.73	38.93±4.7	25.84±3.48	25.33±4.3	24.13±1.89	26.63±2.95
124	Tetradecane, 5-methyl-	25117-32-2	1343.44		31.73±0.93	36.53±4.28	71.03±1.57	65.05±4.64	28.4±1.81	41.73±6.32	44.98±8.26	40.17±4.33	35.5±4.93	31.06±2.21	52.96±6.8	55.43±13.32
125	Heptadecane	629-78-7	1550.89		30.83±1.6	30.33±2.18	16.12±0.9	20.27±2.59	11.63±2.08	18.49±3.64	13.13±0.94	23.02±4.11	72.7±7.78	29.68±3.1	55.59±3.03	56.56±2.2
126	Cyclopentane, 1-hexyl-3-methyl-	61142-68-5	1130.83		26.26±1.48	54.99±5.31	97.98±7.54	157.26±4.46	53.67±3.41	48.54±2.49	81.57±2.98	43.52±2.36	225.29±8.46	199.1±14.49	187±18.13	320.4±46.64
127	Tridecane, 4-methyl-	26730-12-1	1355.85		25.86±2.28	23.98±0.38	22.59±1.23	22.67±2.35	14.54±1.53	16.81±1.89	13.42±1.63	16.14±1.26	13.09±0.9	12.95±2.33	11.48±1.4	13.12±1.92
128	Dodecane, 1-iodo-	4292-19-7	1325.28		24.48±2.93	24.94±1.82	21.16±0.95	24.41±2.2	12.5±1.16	15.36±2.01	12.87±2.35	19.12±1.72	18.99±2.61	12.35±1.29	15.25±1.97	16.82±1.17
129	n-Nonylcyclohexane	2883-02-5	1551.22		11.33±0.17	9.91±0.54	7.04±0.46	7.64±0.37	8.33±0.71	8.65±0.78	6.35±0.13	7.57±1.45	13.83±1.33	9.03±0.18	12.69±0.87	12.92±1.29
130	Pentadecane, 2,6,10,14-tetramethyl-	1921-70-6	1803.73	fresh sweet	9.26±2.72	11.89±0.66	10.83±2.18	8.53±1.54	9.76±2.99	15.99±3.33	4.74±1.36	8.14±2.68	6.77±0.96	7.68±1.04	8.1±1.74	6.98±1.61
131	Hexadecane, 1-iodo-	544-77-4	1772.44		5.62±1.33	6.1±0.58	8.68±0.77	8.09±0.23	6.43±1.7	11.82±2.13	7.13±1.86	10.96±2.54	4.37±0.51	4.43±0.42	4.98±1.21	5.43±1.09
132	1,5,9-Cyclododecatriene, 1,5,9-trimethyl-	21064-19-7	1390.32		4.32±0.48	5.27±0.33	3.35±0.25	0±0	0±0	0±0	1.34±1.03	5.45±1.46	2.14±0.39	2.88±0.25	45.1±4.27	11.75±0.47
133	1H-Indene, 2,3-dihydro-1,5,7-trimethyl-	54340-88-4	1327.94		3.15±0.7	3.16±0.65	3.23±0.16	3.55±0.68	4.76±0.66	2.25±0.25	2.44±0.39	2.26±0.43	0.94±0.14	1.42±0.45	1.28±0.49	5.91±0.42
	Ketone
134	5-Hepten-2-one, 6-methyl-	110-93-0	985.412	floral,fruity,fresh sweet	1148.75±183.08	1035.2±49.22	1566.51±102.91	1553.18±135.19	1343.5±202.13	673.76±27.35	1860.37±133.61	1348.84±95.8	1576.45±87.31	1954.54±145.58	2129.23±242.31	2647.25±322.81
135	3,5-Octadien-2-one, (E,E)-	30086-02-3	1095.52	sweet,green	1114.13±85.36	1283.33±70.95	1873.98±46.65	1853.59±101.4	645.11±74.86	357.14±22.57	1791.39±26.86	1096.05±54.25	2380.17±52.99	2152.56±80.51	2213.94±62.88	2905.03±156.31
136	trans-.beta.-Ionone	79-77-6	1479.93	woody,violet	778.96±91.01	820.15±98.08	574.16±47.39	581.43±19.76	335.69±17.83	503.86±63.23	631.67±79.15	596.11±66.41	818.04±35.19	645.73±15.01	588.37±38.76	471.82±11.51
137	(R,S)-5-Ethyl-6-methyl-3E-hepten-2-one	57283-79-1	1141.58		436.67±30.47	677.14±49.18	1117.81±15.95	993.71±34.32	1028.57±68.59	405.35±13.06	865.86±18.18	404.06±1.54	1452.25±9.05	1487.49±17.26	1597.64±135.76	1240.36±104.84
138	3-Buten-2-one, 4-(2,2,6-trimethyl-7-oxabicyclo[4.1.0]hept-1-yl)-	23267-57-4	1482.98		409.98±59.68	570.99±88.05	801.39±66.69	771.08±44.51	568.81±23.07	466.77±81.91	535.42±88.98	218.37±34.91	1078.3±50.67	1468.08±27.07	1242.24±98.65	660.95±58.64
139	3,6,6-TRIMETHYL-CYCLOHEX-2-ENONE	23438-77-9	1059.53		263.35±29.85	197.7±7.21	165.87±7.83	154.55±4.99	172.56±21.41	98.73±2.03	228.44±6.06	151.03±8.49	309.34±15.98	326.45±12.36	205.99±10.46	167.07±17.05
140	2-Decanone	693-54-9	1127.73	floral, orange, peach, fatty	255.89±24.33	482.03±54.35	439.12±4.45	728.26±14.27	190.33±7.43	629.06±39.48	195.34±16.3	450.44±12.41	529.96±17.99	799.34±24.83	554.38±43.74	926.64±113.79
141	2-Heptanone	110-43-0	889.422	pear,banana	203.04±25.63	309.53±22.98	580.3±10.95	478.79±23.09	554.98±128.79	173.33±10.83	583.02±36.79	309.81±22.21	972.22±163.42	1087.09±61.16	1225.94±176.03	1322.79±296.96
142	Isophorone	78-59-1	1125.68	mint	201.59±34.27	237.11±26.81	173.98±20.07	166.62±10.49	166.34±12.23	127.38±13.77	158.84±17.77	231.54±35.32	169.76±7.01	207.19±1.33	156.18±6.01	154.11±36.23
143	5,9-Undecadien-2-one, 6,10-dimethyl-, (E)-	3796-70-1	1446.93	flower,fruity	187.1±15.44	190.7±17.93	183±5.48	181.64±6.13	119.33±8.97	134.76±11.87	189.92±25.62	139.09±18.01	198.99±15.91	200.56±1.58	180.04±5.09	148.23±5.57
144	1-Penten-3-one	1629-58-9	742.971	pungency	161.12±24.18	79.73±9.45	117.69±7.14	99.94±6.17	132.34±19.05	70.66±4.26	92.27±17.23	28.76±1.58	146.96±17.19	97.04±11.78	131.87±13.77	134.33±13.91
145	.alpha.-Ionone	127-41-3	1423.28	warm woody,violet	145.98±11.84	160.98±14.32	135.32±7.61	115.14±5.7	112.86±6.29	93.08±11.54	127.96±16.25	146.88±14.86	144.68±7.61	142.76±1.24	136.65±5.04	91.28±2.32
146	Acetophenone	98-86-2	1067.61	fruity	137.06±9.57	100.4±11.42	115.16±7.07	73.32±1.64	108.72±26.43	71.52±3.99	110.66±13.63	73.06±2.19	90.91±11.98	132.49±4.07	140.98±7.04	140.79±21.96
147	3-Octen-2-one	1669-44-9	1038.96	nut,fruity	113.75±10.75	160.52±4.41	259.82±2.5	237.66±9.15	147.85±22.09	78.47±7.26	193.37±11.64	96.91±4.05	448.59±16.06	296.39±27.73	281.04±23	347.18±50.89
148	4H-1,3-Dioxin-4-one, 2-(1,1-dimethylethyl)-6-methyl-, (R)-	107289-20-3	1104.37		67.57±8.83	65.9±3.77	55.86±2.38	61.56±7.93	42.66±0.9	46.64±5.18	38.88±7.13	52.22±4.29	75.53±11.75	71.43±8.29	79.42±20.14	79.53±10.14
149	2,6,6-Trimethyl-2-cyclohexene-1,4-dione	1125-21-9	1146.57	green	39.14±1.3	46.68±0.97	61.51±1.43	57.91±1.08	56.18±6.06	28.87±1.81	49.01±0.54	26.92±0.83	92.16±3.7	211.34±22.34	93.44±6.78	76.64±14.52
150	1-(2-Hydroxyethyl)-2-imidazolidinone	3699-54-5	1286.27		38.29±4.03	42.83±8.05	41.86±4.44	41.44±3.47	30.34±0.27	22.68±3.41	27.98±3.49	27.41±5.57	87.43±8.26	79.02±4.55	61.81±6.49	54.79±8.51
151	2-Heptanone, 6-methyl-	928-68-7	955.086	coarseness	36.01±2.79	41.63±5.46	71.34±2.89	64.32±8.29	75.5±13.08	25.57±5.99	74.97±4.28	38.52±1.13	153.29±8.67	164.52±8.97	151.06±13.31	117.27±5.17
152	2-Cyclopenten-1-one, 3-methyl-2-(2-pentenyl)-, (Z)-	488-10-8	1395.6	jasmine,celery	24.31±3.71	57.4±14.34	135.47±11.66	209.96±8.24	17.07±0.42	32.62±6.51	13.22±1.59	29.72±2.21	10.82±0.98	133.89±16.26	28.8±1.72	149.69±20.75
153	2-Buten-1-one, 1-(2,6,6-trimethyl-1,3-cyclohexadien-1-yl)-, (E)-	23726-93-4	1380.07	strong rose	24.22±1.52	36.25±2.93	8.38±0.49	14.38±0.68	8.68±0.51	13.22±1.16	14.28±1.07	22.87±0.33	7.22±1.1	15.66±1.1	4.83±1	12.66±1.2
154	2-Undecanone, 6,10-dimethyl-	1604-34-8	1401.25		22.81±2.56	34.51±2.17	55.48±2.22	43.47±1.27	41.86±1.19	19.87±2.61	36.16±5.37	27.45±3.68	65.07±3.19	94.35±4.34	81.07±3.54	53.87±2.38
155	3-Cyclohexen-1-one, 3,5,5-trimethyl-	471-01-2	1079.78	camphor	13.92±0.89	20.95±2.74	24.67±1.78	51.33±2.08	24.42±4.07	45.79±1.75	13.53±0.93	35.26±2.28	72.29±6.3	115.75±7.8	37.49±5.75	66.06±4.57
156	2-Pentadecanone, 6,10,14-trimethyl-	502-69-2	1842.42	roasted,sweet	11.21±4.82	26.73±1.76	22.03±1.88	12.55±1.64	26.85±11.38	27.95±7.59	13.49±5.31	18.09±5.86	12.93±2.72	21.98±0.36	24.91±7.47	14.57±2.51
157	2,4,7(1H,3H,8H)-Pteridinetrione	2577-38-0	1322.05		4.29±0.53	7.63±1.18	11.98±0.44	12.27±1.42	9.01±0.33	3.37±0.58	9.07±1.55	3.03±0.53	12.99±1.81	24.53±0.83	16.98±1.29	14.48±0.87
158	2-Pyrrolidinone, 1-ethenyl-	88-12-0	956.567		3.94±0.89	5.35±0.67	5.65±0.61	5.52±0.17	9.42±0.78	4.35±0.55	5.87±0.29	4.4±0.32	10.92±4.34	8.75±0.41	7.72±1.71	6.51±1.28
159	2-Butanone, 4-(4-hydroxy-3-methoxyphenyl)-	122-48-5	1436.4	sweet,floral	2.16±0.19	0.92±0.24	1.41±0.28	1.58±0.26	1.22±0.24	1.82±0.24	1.51±0.2	1.33±0.05	1.25±0.22	1.35±0.04	0.97±0.14	0.98±0.24
160	1,3-Butanedione, 2-sec-butyl-1-phenyl-	10225-40-8	1330.13		1.68±0.23	2.29±0.78	3.67±0.36	3.19±0.07	4.19±0.59	2.23±0.23	2.11±0.31	1.76±0.67	0.65±0.08	1.36±0.09	1.62±0.47	5.48±0.55
161	2-Butanone, 1-chloro-	616-27-3	857.399		0±0	143.97±20.04	261.01±14.62	233.58±17.21	148.38±33.87	201.72±6.81	131±24.13	0±0	265±12.48	142.69±15	246.16±44.83	200.9±13.38
	Heterocyclic compound
162	2-Isoamylpyrazine	40790-22-5	1090.08		8295.53±331.64	8402.18±195.29	8029.66±90.3	9418.22±179.57	10521.21±704.41	8146.08±139.98	9986.57±80.51	5397.26±189.64	7657.06±279.01	7218.28±572.02	9553.41±364.58	9066.99±790.43
163	4-Amino-2(1H)-pyridinone	38767-72-5	1062.55		2493.77±203.94	2250.42±115.02	2118.81±42.59	2101.65±42.06	2684.21±243.88	2224.21±74.57	2329.27±182.4	2319.36±190.89	2346.37±46.37	2387.54±256.87	2079.18±139.11	1953.14±202.58
164	1H-Imidazole-2-methanol, 1-methyl-	17334-08-6	962.258		1405.5±135.64	1269.58±117.18	1093.86±20.71	1059.08±34.2	1601.4±203.05	1259.12±54.02	1290.89±138.44	1323.99±162.72	1338.42±60.06	1303.31±164.64	1038.22±52.88	961.97±90.33
165	1-Propanone, 1-(2-furanyl)-	3194-15-8	1071.13		1351.57±98.01	1783.91±38.04	2098.51±52.55	2105.98±127.6	1726.61±222.41	1085.77±32.16	2474.92±14.12	1556.18±21.4	2995.11±18.27	1684.58±133.67	2300.25±106.4	3083.2±249.26
166	1-[(1-Oxo-2-propenyl)oxy]-2,5-pyrrolidinedione	38862-24-7	1182.91		1217.1±80.53	1288.19±105.29	1179.14±63.34	1450.09±62.77	1459.06±183.46	1063.91±104.09	1385.22±47	1061.72±21.92	989.7±143.24	973.06±68.96	1333.69±76.39	1164.77±263.62
167	Furan, 2-methyl-5-(methylthio)-	13678-59-6	1086.08		888.56±50.81	859.16±34.66	819.06±17.97	826.49±22.9	953.14±63.57	834.82±49.93	856.17±51.38	820.64±37.59	843.77±2.27	856.18±83.56	821.5±65.62	802.72±92.9
168	Benzofurazan	273-09-6	1044.69		735.24±88.03	721.61±42.4	403.46±9.61	287.23±28.45	798.62±134.14	542.2±15.39	705.54±26.72	396.29±57.59	333.78±12.59	317.6±21.58	482.15±54.92	349.68±78.37
169	Propanenitrile, 3-hydroxy-	109-78-4	852.943		320.62±59.33	349.36±33.22	425.98±15.07	418.98±34.61	370.23±69.82	379.88±65.48	297.52±61.22	208.47±14.84	454.54±28.55	360.42±39.42	347.39±23.53	326.72±62.59
170	Piperidine, 1-methyl-	626-67-5	835.41		246.95±34.53	211.2±23.44	171.05±3.47	173.95±17.25	257.13±31.45	202.21±7.55	198.29±19.21	199.37±17.38	224.12±11.93	205.17±14.5	151.24±4.98	132.01±16.27
171	1H-Tetrazole, 5-methyl-	4076-36-2	880.481		229.15±32.14	425.57±53.82	824.74±40.49	757.56±31.81	466.18±125.08	296.19±9.3	428.09±41.81	73.43±5.7	1212.32±114.78	679.69±81.12	923.54±93.19	904.61±256.47
172	2-Acetyl-5-methylfuran	1193-79-9	1106.58	roasted	221.65±16.71	293.6±18.87	363.88±5.45	335.81±22.17	243.05±17.01	135.72±10.62	324.86±26.62	168.25±13.47	325.91±32.91	432.48±19.55	367.51±18.21	342.31±27.88
173	2-Aminopyridine	504-29-0	832.365		159.06±17.72	60.28±5.48	34.39±0.7	68.85±4.42	45.9±7.27	18.21±0.92	99.52±5.52	38.74±3.28	61.15±5.48	182.72±16.62	63.71±1.92	209.25±31.61
174	1H-1,2,4-Triazole	288-88-0	857.774		153.14±51.78	178.36±14.82	344.43±3.01	384.9±11.01	170.67±58.56	291.04±45.52	222.67±41.26	0±0	443.09±31.09	157.39±23.02	363.38±47.47	323.94±52.48
175	3,5-Diamino-1,2,4-triazole	1455-77-2	1256.29		118.75±11.49	90.54±2.88	55.48±10.45	74.7±12.39	42.13±8.83	69.94±3.16	71.43±14.85	87.55±10.01	82.74±1.57	50.44±2.62	58.13±2.11	66.65±3.02
176	Furan, 2-methoxy-	25414-22-6	797.538		98.41±5.34	170.13±6.67	163.3±5.26	143.12±18.03	179.72±26.62	131.64±24.44	185.38±12.03	170.08±8.74	149.12±11.47	291.47±34.82	201.19±23.42	354.11±62.93
177	Thiazole, 2-methyl-4-(1-methylethyl)-	32272-52-9	1171.77		92.38±14.75	80.66±2.93	52.97±1.26	67.27±5.85	67.28±9.83	48.51±5.63	58.99±2.44	61.44±4.33	33.28±3.46	37.08±4.54	53.1±2.92	42.39±2.8
178	Undecane, 3-methyl-	1002-43-3	1168.67		90.79±8.03	53.04±2.56	120.94±6.72	147.41±14.92	35.52±2.72	72.31±7.28	96.51±23.97	132.44±16.11	64.16±8.58	35.2±4.01	26.61±5.94	33.81±5.92
179	Isoxazole, 4-(chloromethyl)-3,5-dimethyl-	19788-37-5	1014.41		87.36±7.65	191.02±4.78	136.87±1.44	87.95±4.6	91.55±10.46	123.43±4.06	115.34±1.16	108.87±6.97	239.49±13.09	85.76±11.32	95.87±4.29	162.15±24.03
180	1H-Tetrazole, 1-methyl-	16681-77-9	1286.62		73.89±8	77.52±0.55	64.53±3.24	79.52±5.38	39.39±1.03	42.34±4.07	42±2.98	61.94±5.05	138.94±13.77	94.07±7.07	106.56±11.76	95.33±9.21
181	Pyrazine, ethyl-	13925-00-3	920.778	roasted sweet	65.45±3.81	130.14±9.28	35.49±0.99	53.84±4.9	24.76±0.71	68.82±8.02	35.66±2.11	103.83±6.92	66.18±5.71	314.49±16.59	72.27±5.56	316.14±55.33
182	3-Pyridinecarbonitrile, 1,2-dihydro-5,6-dimethyl-2-oxo-	72716-80-4	1158.8		57.11±7.64	50.35±1.39	39.21±2.17	57.67±6.68	27.37±2.61	36.62±2.5	34.56±5.45	54.69±9.69	30.67±7.16	30.4±4.16	25.66±4.86	28.06±2.01
183	3-Methylbenzothiophene	1455-18-1	1199.84		51.92±1	60.05±2.24	36.79±0.93	54.51±2.28	39.46±5.51	54.64±5.08	55.81±0.83	35±2.86	30.16±4.06	29.27±1.29	32.1±2.54	45.51±2.03
184	3-Acetyl-2,5-dimethylthiophene	2530-10-1	1237.52		30.02±7.96	54.37±6.33	75.99±6.24	56.57±4.96	61.6±6.42	47.98±19.09	47.68±8.57	19.35±6.45	63.83±1.14	141.73±6.5	92.1±22.46	74.46±24.43
185	2(4H)-Benzofuranone, 5,6,7,7a-tetrahydro-3,6-dimethyl-	13341-72-5	1308.75		21.41±0.88	25.91±1.7	20.61±1.2	18.44±0.78	13.71±0.45	16.02±2	20.04±1.18	17.58±1.23	25.26±0.9	28.01±0.38	19.06±2.12	18.71±2.98
186	1H-Benzimidazole, 5,6-dimethyl-	582-60-5	1281.74		17.16±2.31	17.35±1.84	15.78±2.59	18.25±1.99	11.03±0.75	9.15±0.12	10.5±1.37	14.6±0.85	9.84±0.91	9.88±0.35	8.29±1.68	11.55±0.79
187	1H-Indene, 2,3-dihydro-4,7-dimethyl-	6682-71-9	1281.69		16.74±2.06	17.03±1.33	15.04±1.75	18.55±2.11	11.11±1.01	9.4±0.24	10.52±1.2	14.57±0.84	10.21±0.96	9.66±0.47	8.29±1.75	11.55±0.72
188	Pyrrolidine, 2-ethyl-1-methyl-	26158-82-7	899.241		16.22±2.19	24.03±3.3	17.67±3.7	19.17±3.59	19.95±3.5	18.01±1.87	24.95±6.07	14.95±2.05	49.16±19.68	35.12±4.5	41.03±5.41	37.94±6.01
189	Naphtho[2,1-d]imidazole	233-53-4	1549.49		11.98±0.25	11.25±0.82	11.81±0.6	12.39±0.13	6.52±0.8	10.52±0.31	8.29±1.12	12.11±1.49	18.7±1.4	9.81±1.28	15.55±1.65	15.56±1.87
190	Thiophene, 2-butyl-5-ethyl-	54411-06-2	1147.7		11.9±0.49	12.09±0.89	9.61±0.24	9.78±1.07	13.48±1.51	8.15±0.15	12.1±0.44	8.14±0.96	17.73±1.18	9.11±0.91	13.52±1.28	8.82±0.77
191	Propanamide, N-phenyl-	620-71-3	1331.45		9.04±2.48	11.77±2.62	8.09±0.84	9.77±1.17	6.79±0.62	10.52±2.1	10±2.21	7.84±1.09	4.02±0.53	5.76±0.55	10.45±1.59	6.86±0.99
192	4H-1,2,4-Triazol-4-amine	584-13-4	947.589		8.57±0.17	18.51±2.73	29.92±1.12	22.29±2.3	24.26±3.04	13.29±0.34	22.79±2.15	8.17±0.72	41.91±0.22	20.69±1.1	32.43±5.83	36.89±5.31
193	Xanthene, 9,9-dimethyl-	19814-75-6	1687.7		2.56±0.33	2.75±0.52	15.22±1.29	8.5±0.58	3.81±0.43	5.25±0.47	0.74±0.23	0.59±0.04	0.85±0.21	0.62±0.01	1.09±0.46	1.03±0.06
194	1H-Indene, 2,3-dihydro-1,1,4,6-tetramethyl-	941-60-6	1400.57		1.16±0.14	2.7±0.14	1.55±0.09	1.88±0.23	0.83±0.18	1.29±0.18	1.44±0.32	1.76±0.23	0.88±0.21	3.32±0.18	1.2±0.11	5.76±0.37
	Ester
195	Benzoic acid, 3-hydroxy-, methyl ester	19438-10-9	1195.47		4932.62±19.82	4440.76±859.48	6203.99±67.61	7655.53±461.54	5059.08±52.56	4832.21±175.27	7804.46±369.38	1777±226.21	4384.98±229.8	5229.04±119.06	7656.25±303.77	6578.2±125.9
196	[3,4,5,6-2H4]-Methyl 2-Hydroxybenzoate	1219802-12-6	1193.13		1515.61±61.74	1391.42±111.52	1340.84±44.06	1355.58±49.76	1551.71±48.4	1348.37±76.44	1376.24±87.17	1324.29±62.58	1294.12±38.37	1330.1±84.4	1325.05±81.35	1235.74±94.45
197	3-Hexen-1-ol, formate, (Z)-	33467-73-1	858.857	fresh fruity,green	1284.06±212.22	1943.82±106.2	3870.04±158.11	3617.27±85.59	2198.1±393.78	2263.8±319.5	1737.78±208.48	651.44±17.39	3592.4±258.01	2674.74±267.36	3317.28±247.26	3051.45±456.94
198	trans-Geranic acid methyl ester	1189-09-9	1319.98	green,orange	455.4±49.18	277.78±48.61	462.99±32.24	385.59±37.95	157.32±6.09	260.85±40.6	234.13±19.38	103.39±6.09	216.92±18.6	130.61±3.21	384.89±24.76	376.54±30.24
199	Propanoic acid, pentyl ester	624-54-4	853.29	apple	203.5±28.15	205.63±20.01	227.21±16.21	232.15±19.15	222.97±38.54	240.46±20.97	196.13±26.69	115.54±8.01	275.41±14.94	205.21±19.73	188.1±6.03	175.44±35.61
200	2(4H)-Benzofuranone, 5,6,7,7a-tetrahydro-4,4,7a-trimethyl-, (R)-	17092-92-1	1533.79	woody,musk	145.62±35.11	202.99±31.93	132.63±15.53	115.17±11.01	99.9±13	194.63±40.16	115.16±22.17	104.99±13.7	172.26±6.51	229.24±10.09	149.97±15.75	125.36±22.72
201	4-Terpinenyl acetate	4821-04-9	1231.82		104.34±11.69	108.45±18.46	75.39±8.69	88.12±17.77	62.01±5.79	60.9±6.17	111.74±8.89	72.59±6.95	31.79±1.96	46.01±4.58	59.38±4.48	73.2±1.69
202	Butanoic acid, 2-oxo-, methyl ester	3952-66-7	976.389		89.75±19.38	135.47±7.71	142.31±12.78	135.04±24.31	102.74±20.71	77.02±13.61	92.57±18.61	92.81±13.56	120.52±6.81	101.07±5.36	125.12±2.36	126.66±44.6
203	cis-3-Hexenyl isovalerate	35154-45-1	1233.88		67.17±8.49	183.66±56.45	206.05±22.98	214.67±63.81	113.06±2.22	127.56±11.78	126.17±4.87	59.52±4.05	115.7±14.99	96.6±4.69	178.03±20.98	196.83±13.32
204	Hexanoic acid, methyl ester	106-70-7	924.975	pineapple	67.01±9.31	38.97±1.94	94.54±1.9	72.97±1.15	62.92±13.88	24.78±2.11	95.82±9.25	38.02±2.8	117.84±4.85	384.24±6.8	223.98±30.19	272.94±42.72
205	Acetic acid, phenylmethyl ester	140-11-4	1162.92	jasmine	54.71±2.22	110.73±13.99	60.46±1.7	102.07±7.75	36.44±2.23	79.09±1.48	37.74±3.84	94.06±4.65	48.33±1.84	78.01±2.99	70.85±1.99	127.73±2.35
206	Benzenecarbothioic acid, S-methyl ester	5925-68-8	1167.43		50.48±3.23	48.54±2.39	60.43±2.75	55.85±2.44	43.83±4.56	30.47±2.14	48.91±1.6	33.6±1.74	52.21±4.63	117.88±5.5	74.46±5.57	98.04±5.96
207	cis-3-Hexenyl-.alpha.-methylbutyrate	53398-85-9	1229	green	45.22±9.07	103.43±25.42	106.14±1.83	219.74±5.05	46.38±0.4	72.75±3.37	8.07±1.42	39.68±5.88	69.07±1.33	107.28±3.69	68.28±10.63	144.05±8.91
208	2(3H)-Furanone, dihydro-4-methyl-	1679-49-8	903.464		33.57±4.68	87.71±14.62	146.95±4.8	161.31±17.52	90.47±21.38	90.27±16.88	122.75±4.03	48.83±11.44	237.69±12.76	190.62±24.78	233.35±11.11	222.38±51.21
209	Nonanoic acid, methyl ester	1731-84-6	1221.9	coconut	17.29±1.28	13.35±1.47	25.95±0.67	20.87±1.7	11.55±0.86	9.97±1.05	16.47±0.91	20.56±1.01	22.73±2.33	54.8±3.96	40.21±4.29	37.76±3.42
210	Hexanoic acid, 3-hexenyl ester, (Z)-	31501-11-8	1378.18	fresh fruity	15.47±0.68	68±17.23	136.06±13.65	106.09±8.54	22.92±1.34	42.55±2.35	11.82±0.75	8.66±0.45	64.73±3.86	44.24±3.4	54.41±5	55.84±4.22
211	Hexadecanoic acid, methyl ester	112-39-0	1924.25	oily, fatty, waxy	12.56±5.52	7.2±0.63	8.44±0.68	6.28±0.91	10.95±5.8	10.34±2.4	11.55±4.24	26.52±10.39	5.04±0.56	13.65±1.83	26.42±8.47	20.26±5.01
212	Formic acid, decyl ester	5451-52-5	1130.84		11.91±1.91	33.99±2.37	66.16±1.6	111.43±4.67	6.49±0.2	25.13±3.19	12±0.81	49.07±1.07	130.16±2.58	195.53±1.8	152.24±14.95	275.61±30.83
213	Octanoic acid, methyl ester	111-11-5	1122.51	fruity,orange,wine	11.53±1.49	8.27±0.54	18.82±1.76	14.93±0.73	21.15±3.69	6.76±0.4	14.46±0.54	9.66±0.73	21.12±1.5	56.01±3.17	42.93±7.66	41.15±7.53
214	2,2,4-Trimethyl-1,3-pentanediol diisobutyrate	6846-50-0	1586.17		10.79±1.13	17.74±1.9	21.92±0.61	16.21±0.6	13.9±0.81	19.82±2.25	8.38±1.66	9.11±1.09	4.15±0.68	7.58±1.12	19.27±2.25	5.66±1.28
215	Heptanoic acid, methyl ester	106-73-0	1122.51	berry, waxy, floral, fruit, sweet, orris, green	10.46±0.84	7.22±0.98	19.31±1.33	15.36±1.32	21.22±3.79	6.41±0.79	15.02±0.82	8.87±0.07	21.4±1.2	56.24±2.45	43.67±8.08	41.89±7.31
216	4-Methoxyphenyl isothiocyanate	2284-20-0	1264.37		7.99±0.74	2.71±0.05	3.8±0.52	4.83±0.46	3±0.35	6.8±0.7	4.81±0.85	4.98±0.32	4.12±0.77	2.81±0.18	1.83±0.46	2.75±0.38
217	Dibutyl phthalate	84-74-2	1959.27	faint	7.22±1.01	11.81±0.67	11.63±0.24	8.95±0.63	22.8±9.41	22.93±5.16	6.77±1.21	8.29±2.75	6.07±1.27	6.91±0.44	7.68±2.27	7.35±1.39
218	Butanoic acid, 3-methyl-, 3,7-dimethyl-2,6-octadienyl ester, (Z)-	3915-83-1	1754.17		3.56±1.23	4.81±0.47	4.76±0.66	3.73±0.47	4.01±0.77	5.29±1.23	2.09±0.49	2.87±0.71	5.73±0.86	4.18±0.72	6.38±1.03	6.68±0.8
219	Hexanoic acid, hexyl ester	6378-65-0	1383.6	bean,fruity	3.48±0.27	19.25±3.87	18.7±1.71	16.59±0.9	9.89±0.78	13±1.68	5.84±0.65	2.58±0.28	19.02±1.3	17.69±2.48	15.11±1.92	11.36±1.61
220	Hexanoic acid, phenylmethyl ester	6938-45-0	1546.3	sweet,fruity	2.5±0.1	2.43±0.37	5.62±0.39	5.54±0.83	3.11±0.52	1.61±0.25	2.81±0.32	1.04±0.16	2.62±0.37	5.28±0.07	5.63±0.7	3.82±0.26

## Sheet: Table S2
Table S2. VIP and FC values of the 13 volatile components
No.	Volatile compounds	ZL1		SL1		BL1		ZL2		SL2		BL2
		VIP Value	FC Value	VIP Value	FC Value	VIP Value	FC Value	VIP Value	FC Value	VIP Value	FC Value	VIP Value	FC Value
1	2-heptanol	1.1631	0.206659	1.05069	0.574195	1.13936	0.538067	1.0758	0.283329	1.00916	0.386758	1.43088	0.29817
2	cedrol	1.15457	0.229516	1.18613	0.386129	1.26021	0.612781	1.15592	0.422163	1.0415	0.645089	1.4497	0.120506
3	m-Xylene	1.00727	0.661377	1.2038	0.504489	1.13919	0.523095	1.11119	0.648044	1.20773	0.581398	1.31988	0.652131
4	beta-isophorone	1.13003	0.664765	1.26133	0.480527	1.23178	0.533329	1.20192	0.383626	1.21504	0.624548	1.39418	0.567599
5	2-Decanone	1.18956	0.530855	1.27078	0.602976	1.26947	0.302567	1.21045	0.433674	1.23385	0.662996	1.34615	0.598272
6	Jasmone	1.12172	0.423511	1.24138	0.645204	1.11144	0.523238	1.18125	0.444849	1.22599	0.0808247	1.42809	0.192396
7	beta-Damascenone	1.19058	0.668147	1.25292	0.582717	1.21088	0.65657	1.20254	0.62452	1.21506	0.460667	1.42575	0.381707
8	(+)-CUPARENE	1.20403	0.551457	1.26626	0.204364	1.22243	0.578984	1.18472	0.468362	1.20785	0.664291	1.46652	0.202214
9	(-)-Calamenene	1.151	1.52644	1.27001	0.570292	1.26869	4.80291	1.18421	1.68864	1.21574	0.581812	1.44222	0.643368
10	2-Aminopyridine	1.21865	2.63845	1.26035	0.499516	1.16	2.52015	1.20605	2.56917	1.22573	0.334652	1.41235	0.304471
11	decyl formate	1.22731	0.350519	1.26286	0.593711	1.25519	0.258497	1.21728	0.244606	1.2436	0.66565	1.36606	0.552388
12	benzyl acetate	1.18526	0.494096	1.24517	0.592381	1.27364	0.46068	1.20994	0.401264	1.23096	0.619537	1.46316	0.554684
13	cis-3-Hexenyl 2-methylbutanoate	1.09177	0.437187	1.27162	0.483041	1.2603	0.637493	1.18674	0.203294	1.23363	0.643833	1.41948	0.474021

## Sheet: Table S3
Table S3. The VOCs of OVA is greater than 1 in all samples
No.	Compounds	Odour description	Threshold(ug/kg)							OAV
				ZLP1	ZLL1	SLP1	SLL1	BLP1	BLL1	ZLP2	ZLL2	SLP2	SLL2	BLP2	BLL2
1	linalool	floral	1.5	5465.14	4367.08	5802.54	6806.19	6898.93	4898.48	6288.74	2848.86	5036.97	4562.47	7085.72	6502.58
2	(E)-furan linalool oxide	green	320	25.2	26.97	23.93	28.87	33.06	23.63	32.26	13.71	20.25	24.41	29.85	26.04
3	geraniol	rose	7.5	996.9	1557.35	2965.38	2388.93	2045.49	2463.91	1511.57	1603.43	851.11	1065.3	2556.29	2354.46
4	2-heptanol	fresh, sweet, fruity	100	2.55	12.36	9.91	17.25	7.78	14.46	4.02	14.18	8.06	20.85	4.75	15.93
5	(-)-alpha-Terpineol	floral	300	-	-	1.2	1.13	-	-	-	-	-	-	1.8	1.43
6	cedar alcohol	woody, floral, sweet	0.5	30.72	133.87	7.15	18.5	21.38	34.9	27.86	65.98	4.77	7.39	90.36	749.83
7	naphthalene	camphor	6.8	278.13	256.37	179.17	212.71	197.83	191.8	151.22	218.19	148.84	175.32	129.79	149.59
8	4-Allylanisole	orange	7.5	7.05	15.42	6.09	11.03	8.83	11.78	7.67	11.46	5.19	8.85	8.64	12.28
9	guaiacol	sweet, nut	0.17	84.1	203.55	276.31	206.1	183.76	123.35	142.38	117.61	241.01	224.91	261.44	301.78
10	benzaldehyde	sweet, almond	300	19.08	17.63	19.03	14.9	15.73	8.61	26.55	13.56	19.23	20.01	23.96	22.08
11	citral	lemon	40	34.79	51.61	85.35	75.66	69.21	74.29	64.19	59.32	46.31	47.87	80.14	83.48
12	hexanal	fruity, fatty	7.5	112.57	118.12	125.38	162.49	155.25	104.34	166.89	65	194.64	163.91	167.52	174.7
13	1-Nonanal	rose, orange	3.5	112.5	105.04	94.29	85.39	86.91	96.06	87.31	91.93	133.14	76.88	82.49	101.43
14	(Z)-3,7-dimethylocta-2,6-dienal	Lemon, sweet	53	4.07	5.43	7.77	6.96	6.35	7.25	6.52	4.64	4.3	3.39	7.55	9.1
15	β-CYCLOCITRAL	sweet	19	11.22	9.89	6.99	6.99	4.62	5.21	8.71	6.48	9.76	5.63	6.14	5.68
16	safranal	woody, fruity	0.7	200.68	147.43	90.19	100.44	128.8	92.59	128.52	98.28	84.11	238.22	99.39	100
17	FEMA 3766	-	0.5	85	83.7	58.13	54.42	94.04	69.22	97.88	52.9	74.12	76.64	74.36	84.34
18	octanoic acid	cheese	800	1.05	1.36	1.27	1.47	1.6	1.22	1.33	1.15	1.01	1.02	1.36	1.27
19	valeric acid	wine	500	-	1.35	2.1	1.91	1.72	1.06	1.81	-	2.39	3.3	2.47	2.24
20	hexanoic acid	sweet	1500	-	-	-	1.14	-	1.02	-	-	-	1.38	-	1.1
21	terpinen-4-ol	floral	5	9.88	19.04	26.39	25.3	14.46	13.15	12.99	11.47	14.43	14.4	20	28.24
22	myrcene	orange	16.6	450.2	531.46	770.72	712.17	678.03	705.23	591.3	627.72	381.91	374.53	742.89	733.28
23	NA	orange	36	48.86	50.57	78.67	73.3	66.39	66.28	60.26	55.19	39.68	36.94	76.91	78.43
24	γ-TERPINENE	orange, lemon	0.0011	270197	314677	506278	450056	403563	402966	349607	336730	246280	218251	462628	491843
25	(1R)-(+)-ALPHA-PINENE	floral, fruity	33	-	-	-	-	-	-	-	-	-	-	6.62	1.71
26	6-Methyl-5-hepten-2-one	floral, fruity, sweet	100	11.49	10.35	15.67	15.53	13.43	6.74	18.6	13.49	15.76	19.55	21.29	26.47
27	3,5-OCTADIEN-2-ONE	sweet, green	0.5	2228.26	2566.65	3747.96	3707.17	1290.22	714.27	3582.79	2192.1	4760.34	4305.12	4427.89	5810.06
28	irisone	woody, floral	0.007	111279	117165	82022.2	83061.2	47955.8	71979.7	90239	85158.2	116862	92247.2	84052.5	67402.6
29	2-decanone	sweet, fruity, floral	9	28.43	53.56	48.79	80.92	21.15	69.9	21.7	50.05	58.88	88.82	61.6	102.96
30	2-heptanone	sweet, fruity	200	1.02	1.55	2.9	2.39	2.77		2.92	1.55	4.86	5.44	6.13	6.61
31	geranylacetone	floral, fruity, sweet	10	18.71	19.07	18.3	18.16	11.93	13.48	18.99	13.91	19.9	20.06	18	14.82
32	ethyl vinyl ketone	fruity	1.2	134.27	66.44	98.07	83.28	110.29	58.88	76.9	23.96	122.46	80.86	109.9	111.94
33	alpha-Ionone	woody, violet	1.64	89.01	98.16	82.51	70.2	68.82	56.76	78.02	89.56	88.22	87.05	83.32	55.66
34	3-OCTEN-2-ONE	nut, fruity	140		1.15	1.86	1.7	1.06		1.38		3.2	2.12	2.01	2.48
35	damasone	rose	0.001	24222	36252.5	8379.81	14380.6	8681.05	13221.8	14283	22870.3	7216.29	15664.9	4831.14	12656.7
36	ethylpyrazine	Roasted, sweet	0.03	2181.69	4337.96	1183.03	1794.55	825.26	2294.07	1188.63	3460.9	2205.97	10482.8	2408.89	10537.9
37	dihydroactinidiolide	woody, sweet, fruity	43	3.39	4.72	3.08	2.68	2.32	4.53	2.68	2.44	4.01	5.33	3.49	2.92
38	methyl hexanoate	pineapple	70	-	-	1.35	1.04	-	-	1.37	-	1.68	5.49	3.2	3.9
39	methyl palmitate	fresh	4	3.14	1.8	2.11	1.57	2.74	2.59	2.89	6.63	1.26	3.41	6.61	5.06
"-" means that the OAV is less than 1

## Sheet: Table S4
Table S4. The serial number in the PLSR analysis corresponds to the VOCs
No.	Volatile compounds
1	Linalool
2	(E)-furan linalool oxide
3	Geraniol
4	2-Heptanol
5	(-)-alpha-Terpineol
6	Cedar alcohol
7	Naphthalene
8	4-Allylanisole
9	Guaiacol
10	Benzaldehyde
11	Citral
12	Hexanal
13	1-Nonanal
14	(Z)-3,7-dimethylocta-2,6-dienal
15	BETA-CYCLOCITRAL
16	SAFRANAL
17	FEMA 3766
18	Octanoic acid
19	Valeric acid
20	Hexanoic acid
21	Terpinen-4-ol
22	Myrcene
23	NA
24	GAMMA-TERPINENE
25	(1R)-(+)-ALPHA-PINENE
26	6-Methyl-5-hepten-2-one
27	3,5-OCTADIEN-2-ONE
28	Irisone
29	2-Decanone
30	2-Heptanone
31	Geranylacetone
32	Ethyl vinyl ketone
33	Alpha-Ionone
34	3-OCTEN-2-ONE
35	Damasone
36	Ethylpyrazine
37	Dihydroactinidiolide
38	Methyl hexanoate
39	Methyl palmitate

## Sheet: Table S5
Table S5. The headspace solid-phase micro extraction (HS-SPME) and gas chromatography-mass spectrometry (GC-MS) conditions
Instrument	Model
GC-MS	8890-7000D (Agilent J&W Scientific, Folsom, CA, USA)
Solid phase microextraction unit	SPME Allow (CTC Analytics AG, Zwingen, Switzerland)
Incubation unit	Fiber Conditioning Station (CTC Analytics AG)
Capillary column	DB-5MS (30 m x 0.25 mm x 0.25 μm) (Agilent J&W Scientific)
Extraction head	120 μm DVB/CAR/ PDMS (Agilent J&W Scientific)
HS-SPME condition	Parameter
Preparation of extraction head	Shake for 5 min at a constant temperature of 60 ℃
The incubate time of extraction head	250 °C for 5 min under Fiber Conditioning Station (before absorb the volatiles)
Extraction time	15 min
Resolution time	5 min at a constant temperature of 250 ℃
Chromatography condition
Carrier gas	Helium (purity ≥ 99.999%)
Column flow	1.2 mL/min
Injector temperature	250 °C
Front inlet mode	Splitless
Solvent delay	3.5 min
Oven temperature ramp	1) 40°C hold on 3.5 min; 2) raised to 100°C at a rate of 10 °C/min; 3) raised to 180°C at a rate of 7 °C/min; 4) raised to 280°C at a rate of 25 °C/min; 5) hold for 5 min
Mass condition	Parameter
Ion source temperature	230°C
Quad temperature	150°C
Front Injection temperature	280°C
Electron energy	70eV
Transfer line temperature	280°C
Scan mode	SIM
The range of mass scan	m/z 50-500 amu
